# Supplementary material for: Late accretion of Ceres-like asteroids and their implantation into the outer main belt
Source: Springer Nature journal article supplement (doi:10.1038/s41550-023-01898-x), 2023-02-20
Supplement: 41550_2023_1898_MOESM1_ESM.pdf [file 41550_2023_1898_MOESM1_ESM.pdf]

---

# Late accretion of Ceres-like asteroids and their implantation into the outer main belt

---

In the format provided by the  
authors and unedited

---

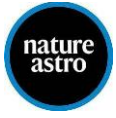

## Table of contents

|                             |    |
|-----------------------------|----|
| Supplementary Figure 1..... | 2  |
| Supplementary Figure 2..... | 3  |
| Supplementary Figure 3..... | 5  |
| Supplementary Figure 4..... | 7  |
| Supplementary Table 1.....  | 9  |
| Supplementary Table 2.....  | 9  |
| Supplementary Table 3.....  | 10 |
| Supplementary Table 4.....  | 11 |
| Supplementary Table 5.....  | 11 |
| Supplementary Table 6.....  | 11 |
| References.....             | 13 |

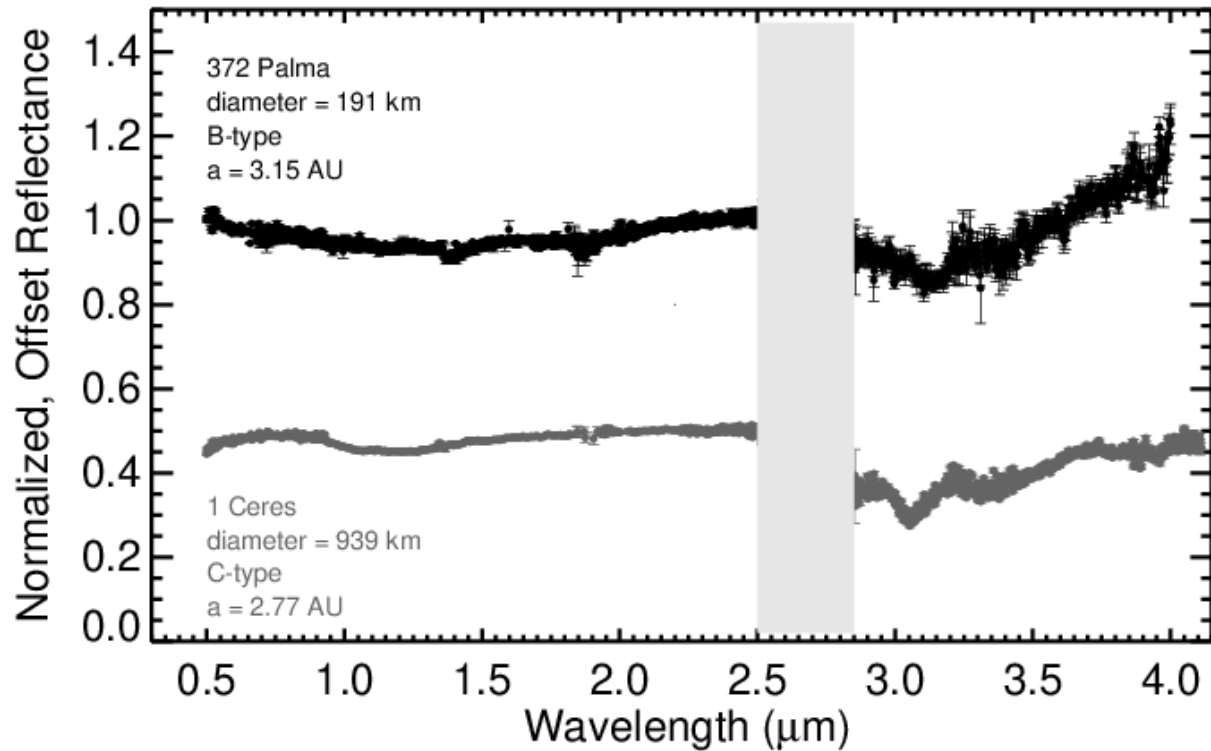

**Fig. 1. Near-infrared reflectance spectrum (binned  $\times 6$ ) of asteroid 372 Palma is constant with the dwarf planet 1 Ceres.** Palma's spectrum has a broad 1- $\mu\text{m}$  absorption feature and an absorption band centered around 3.15  $\mu\text{m}$ , consistent with Ceres' spectrum ([MITHNEOS MIT-Hawaii Near-Earth Object Spectroscopic Survey](#), (1)). The gray bar marks wavelengths of strong absorption by water vapor in Earth's atmosphere. See Supplementary Fig. 2 for spectra of all other newly identified large dark asteroids. Uncertainties were computed by Spextool software (2) using the Robust Weighted Mean algorithm with a clipping threshold of 8 ( $\sigma$ ). The value at each pixel is the weighted average of the good pixels, and the propagated variance gives the uncertainty.

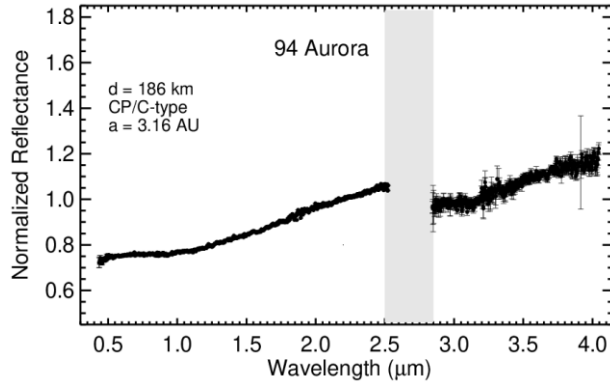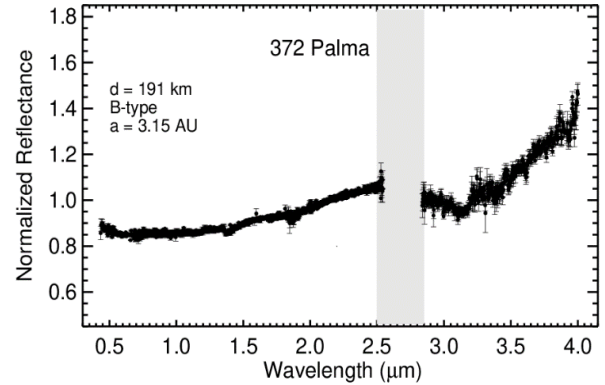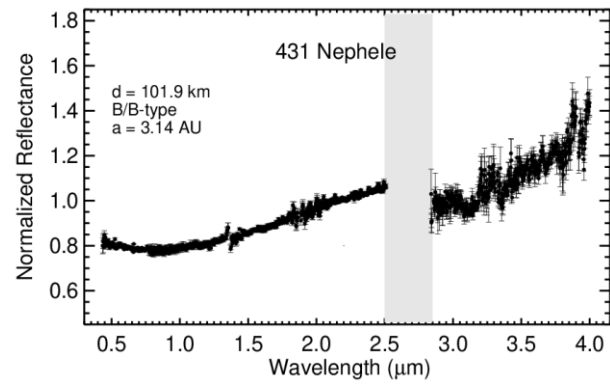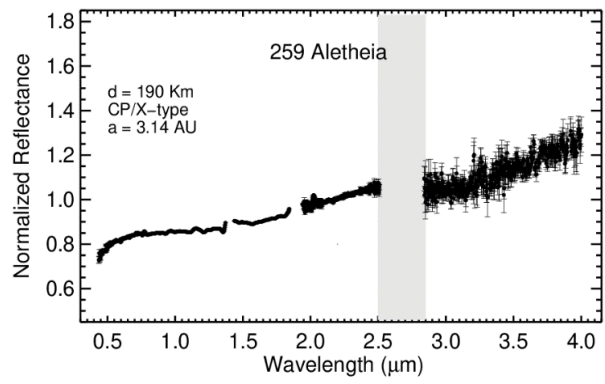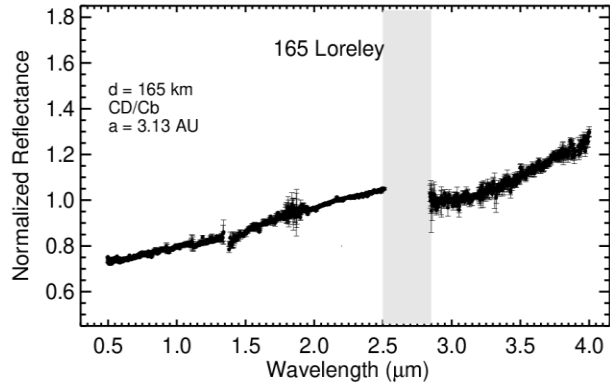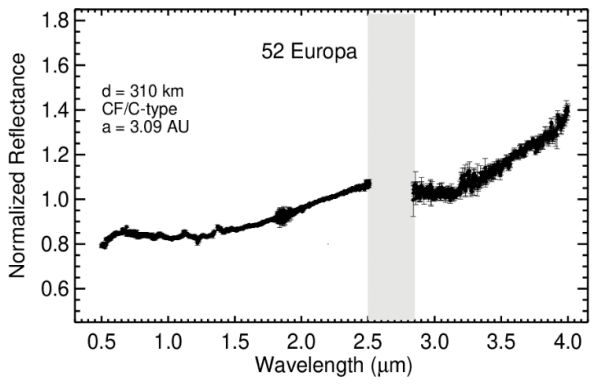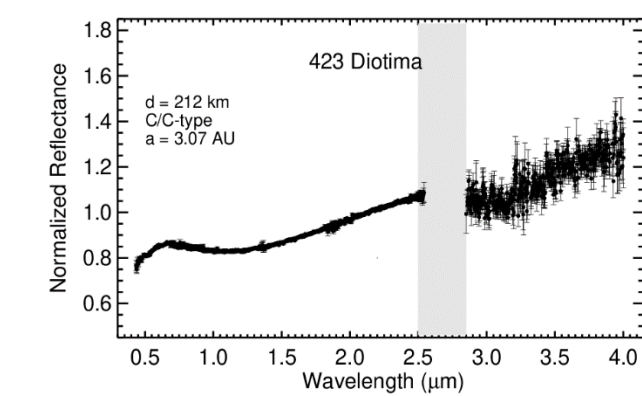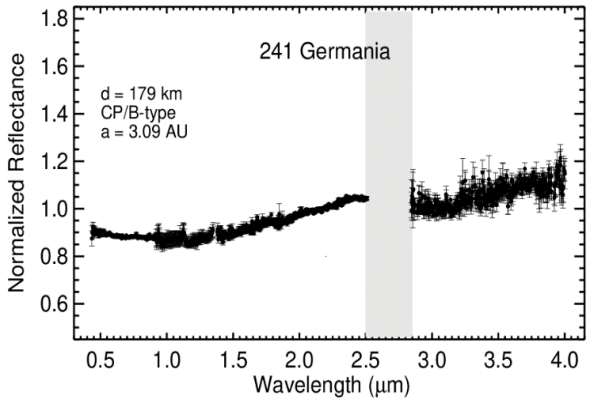

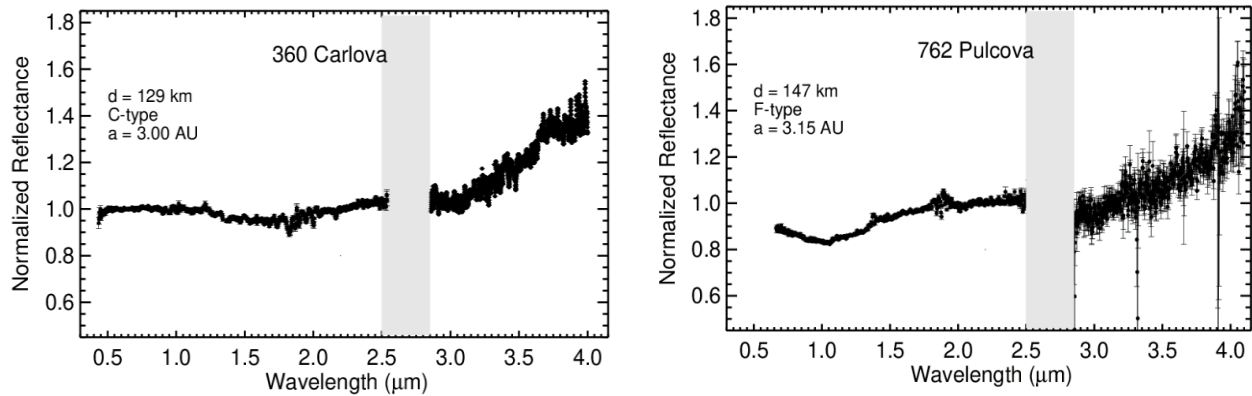

**Fig. 2. Near-infrared (binned x 6) reflectance spectra of newly identified large dark asteroids found to be consistent with the dwarf planet 1 Ceres.** All spectra have been normalized to unity at 2.2  $\mu\text{m}$ . The gray bar on each plot marks wavelengths of strong absorption by water vapor in Earth's atmosphere. Asteroid (52) Europa was reobserved in this study, and its spectra were found to be similar to the ones published in Takir and Emery (3). Uncertainties were computed by Spextool software using the Robust Weighted Mean algorithm with a clipping threshold of 8 (sigma). The value at each pixel is the weighted average of the good pixels, and the propagated variance gives the uncertainty.

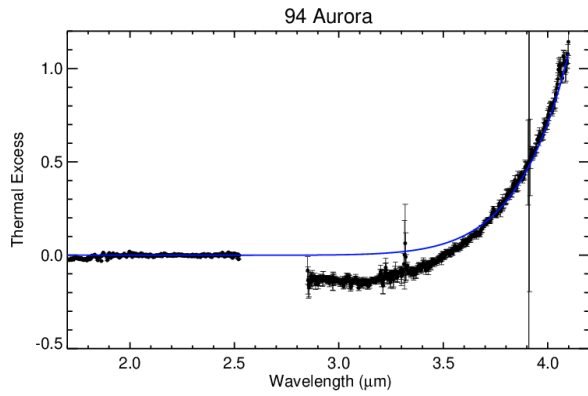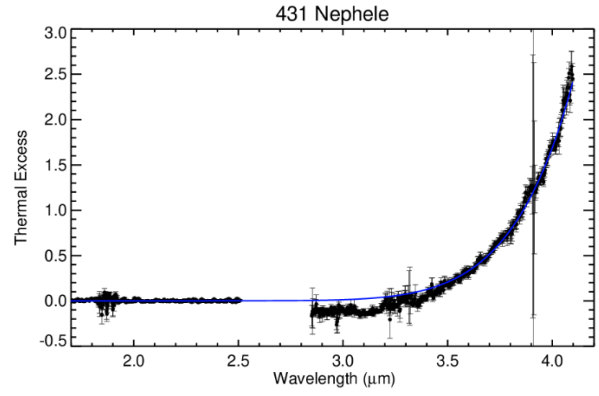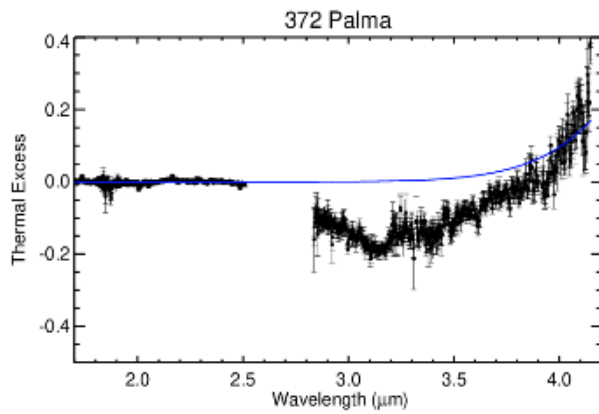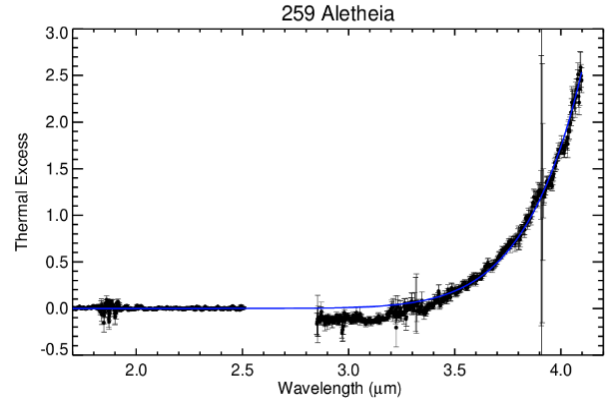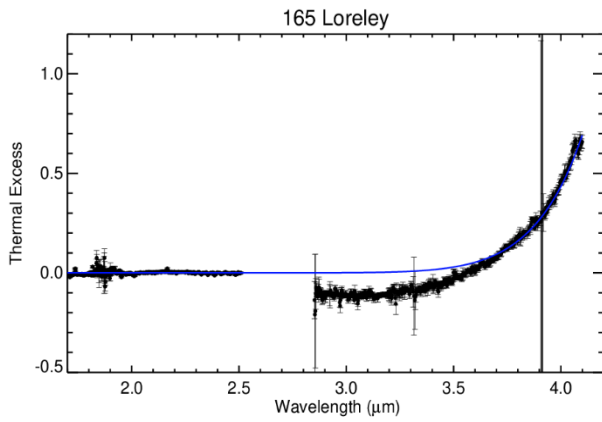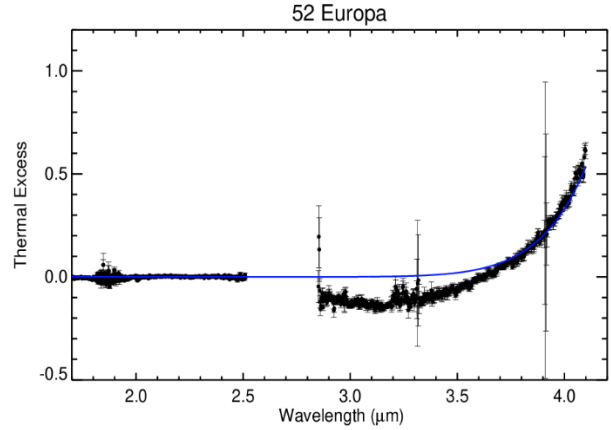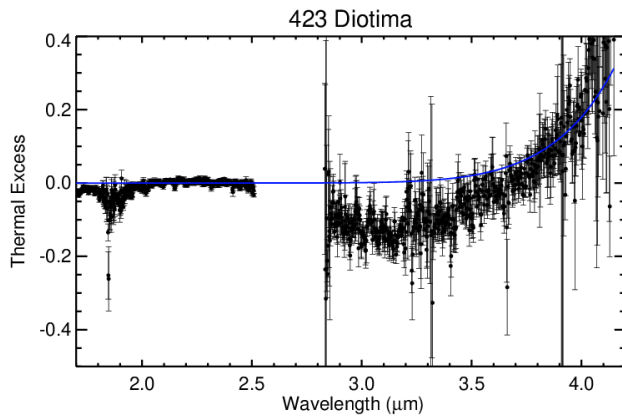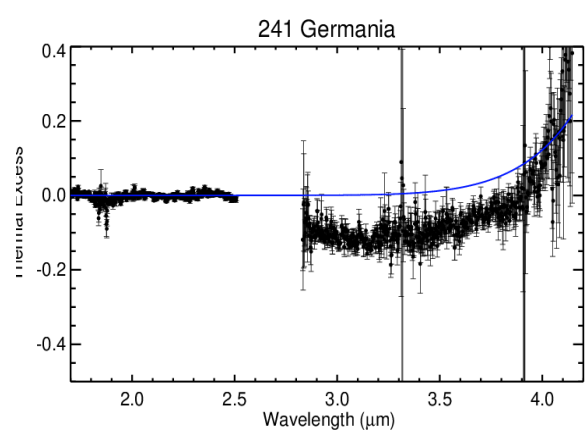

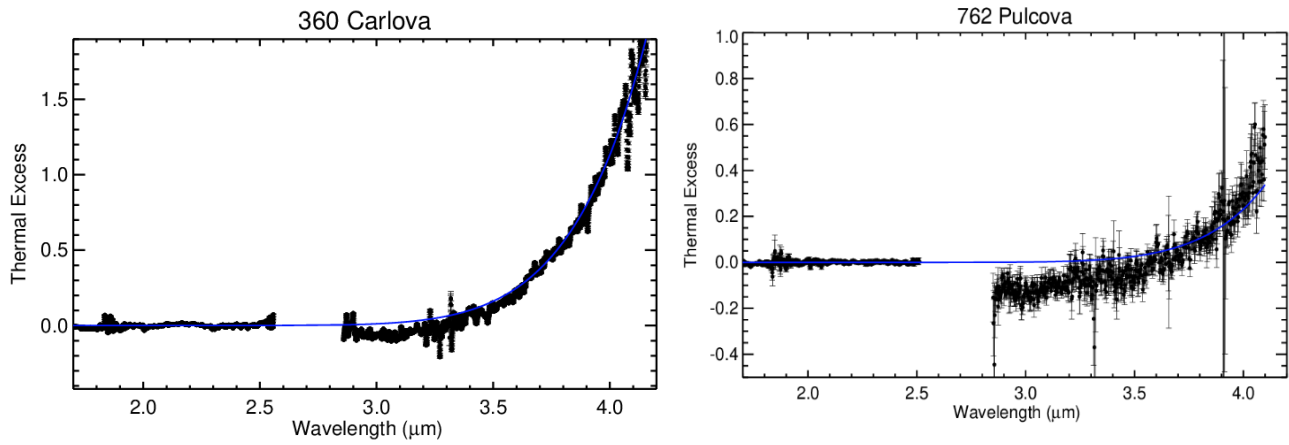

**Fig. 3. Thermal excess and NEATM’s best thermal model (in blue) for the studied large dark asteroids.** Uncertainties were computed by Spextool software using the Robust Weighted Mean algorithm with a clipping threshold of 8 (sigma). The value at each pixel is the weighted average of the good pixels, and the propagated variance gives the uncertainty.

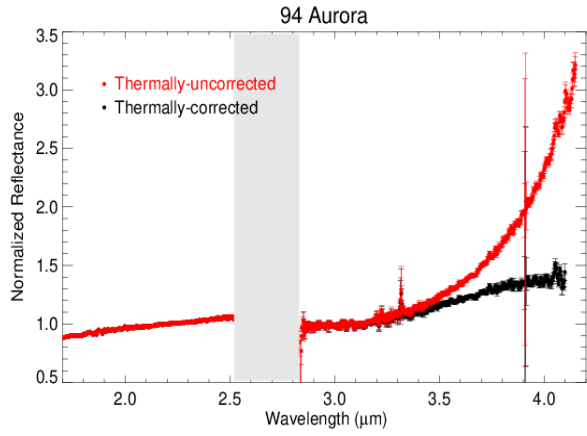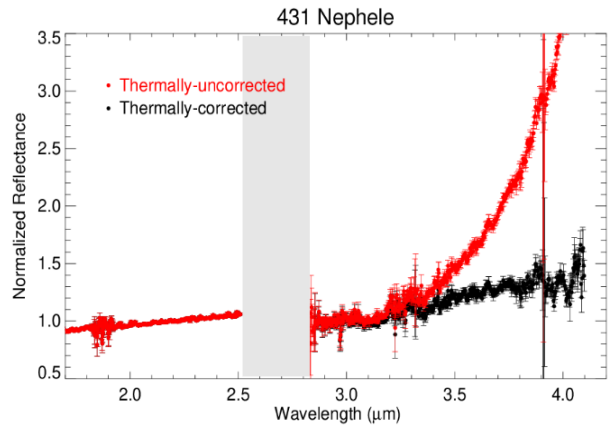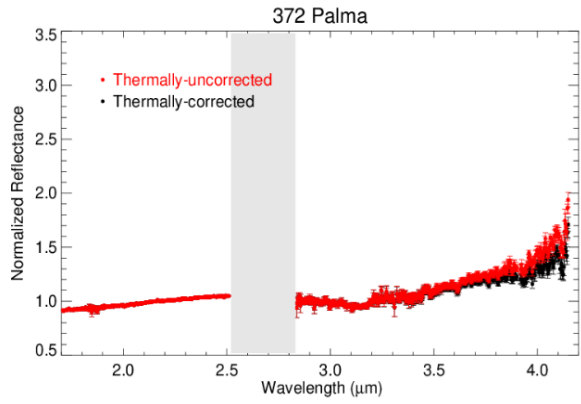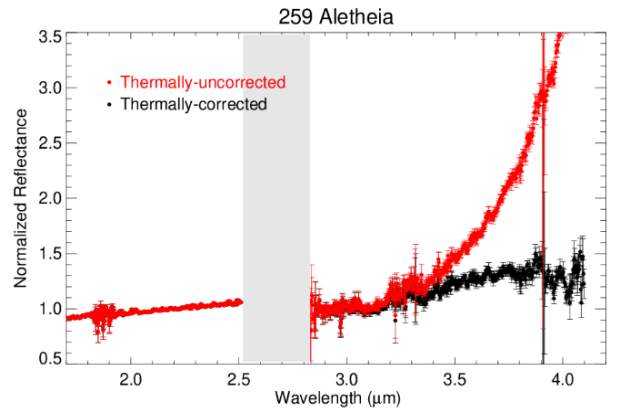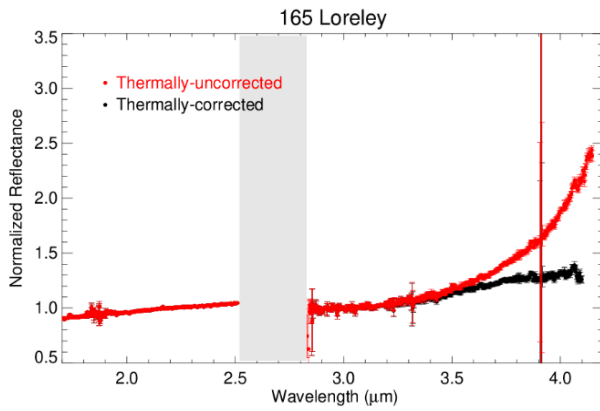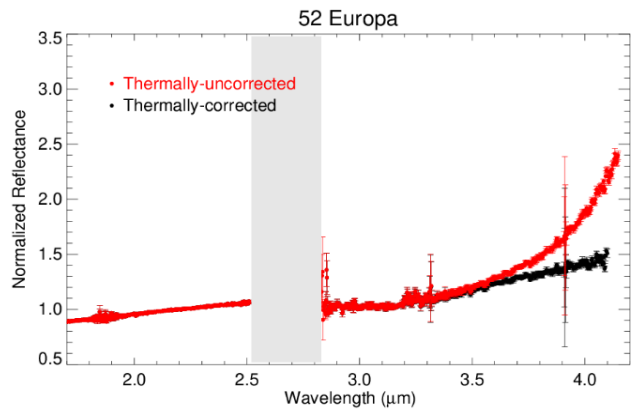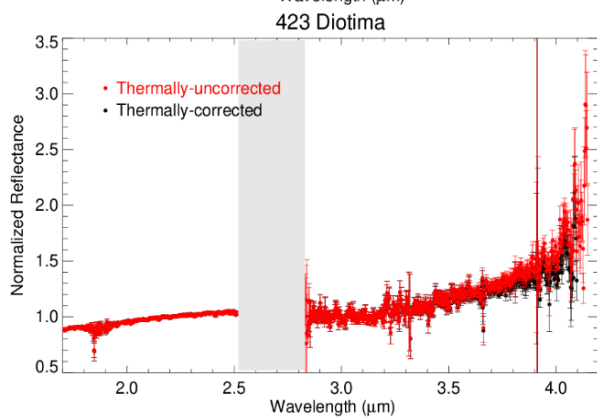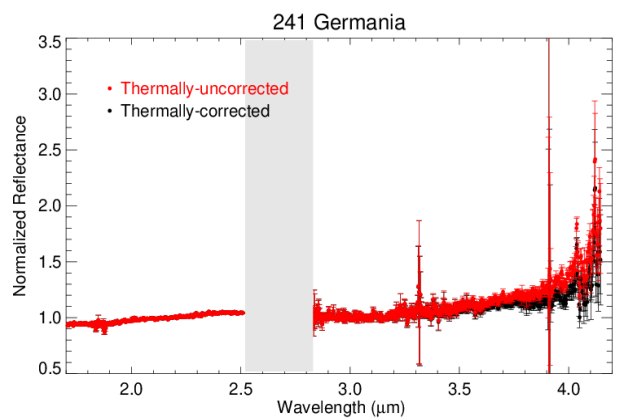



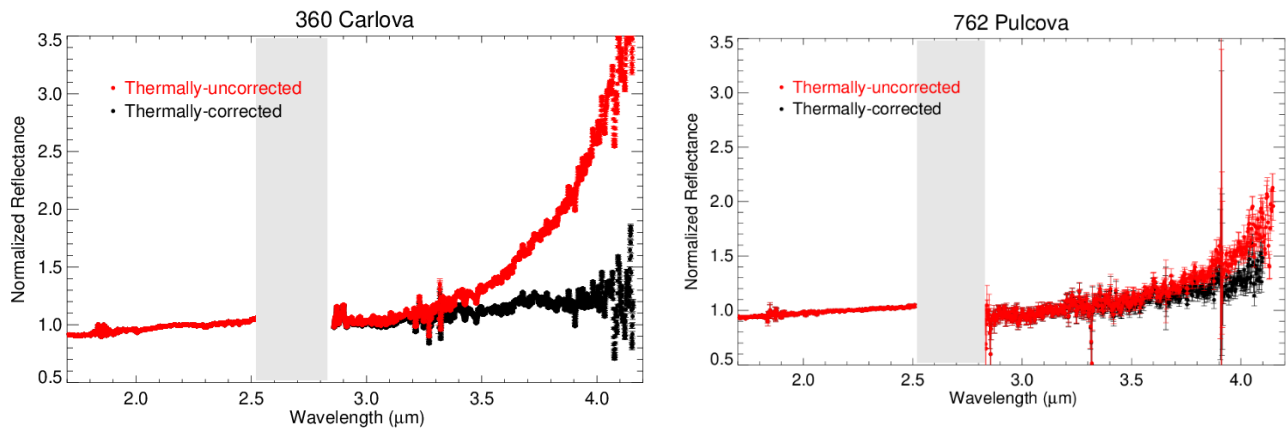

**Fig. 4. Thermally uncorrected (red) and corrected (black) spectra of large dark asteroids.** The gray bar marks wavelengths of strong absorption by water vapor in Earth’s atmosphere. Uncertainties were computed by Spextool software using the Robust Weighted Mean algorithm with a clipping threshold of 8 (sigma). The value at each pixel is the weighted average of the good pixels, and the propagated variance gives the uncertainty.

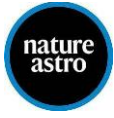

**Table 1.** Physical properties of the large dark asteroids included in this study. Source: <http://ssd.j.nasa.gov/sbdb.cgi>. Asteroid (65) Cybele was observed by Licandro et al. (4); asteroid 24 Themis was observed by Rivkin and Emery (5) and Campins et al. (6); asteroids 31 Euphrosyne, 10 Hygiea, and 451 Patientia were observed by Takir and Emery (3).

| Asteroid      | a (AU) | Eccentricity | Inclination (deg) | diameter (km)* | Spectral Class | Albedo | Average Density (kg m <sup>-3</sup> )* |
|---------------|--------|--------------|-------------------|----------------|----------------|--------|----------------------------------------|
| 65 Cybele     | 3.42   | 0.11         | 3.57              | 248.29 ± 17.59 | P/Xc           | 0.071  | 1700±520                               |
| 94 Aurora     | 3.16   | 0.09         | 7.97              | 186.35 ± 8.84  | CP/C           | 0.040  | 1830 ± 1100                            |
| 31 Euphrosyne | 3.16   | 0.22         | 26.27             | 272.82 ± 8.85  | C              | 0.054  | --                                     |
| 372 Palma     | 3.15   | 0.25         | 23.82             | 191.12 ± 2.68  | BFC/B          | 0.059  | 1400 ± 180                             |
| 431 Nephela   | 3.14   | 0.17         | 1.83              | 93.00 ± 4.00   | B/B            | 0.055  | 1767±1007                              |
| 259 Aletheia  | 3.14   | 0.12         | 10.81             | 190.05 ± 6.82  | CP/X           | 0.043  | 2160 ± 260                             |
| 10 Hygiea     | 3.14   | 0.11         | 3.83              | 421.60 ± 25.69 | C              | 0.072  | 1945±265                               |
| 24 Themis     | 3.14   | 0.12         | 0.75              | 183.84 ± 11.40 | C/B            | 0.067  | 1810 ± 670                             |
| 762 Pulcova   | 3.15   | 0.11         | 13.10             | 138.40 ± 5.96  | F              | 0.040  | 1000 ± 140                             |
| 165 Loreley   | 3.13   | 0.09         | 11.23             | 164.92 ± 8.14  | CD/Cb          | 0.047  | --                                     |
| 52 Europa     | 3.09   | 0.11         | 7.48              | 310.21 ± 10.34 | CF/C           | 0.057  | 1500±400                               |
| 423 Diotima   | 3.07   | 0.04         | 11.24             | 211.64 ± 16.02 | C/C            | 0.067  | 1390 ± 500                             |
| 451 Patientia | 3.06   | 0.07         | 15.20             | 234.42 ± 10.17 | CU             | 0.076  | 1600 ± 800                             |

\*The diameter and average density are from Carry (7) and Vernazza et al. (8) as well as Fienga et al. (9).

**Table 2.** Band depth, center, and area calculations with uncertainties for the studied large dark asteroids. Source: <http://ssd.jpl.nasa.gov/horizons.cgi>. This table also includes asteroid thermal model inputs used for the studied large and dark asteroids.

| Asteroid     | 3- $\mu$ m Band Center ( $\mu$ m) | 3- $\mu$ m Band Depth (%) | 3- $\mu$ m Band Area ( $\mu$ m <sup>-1</sup> ) | Rau (AU) | Dau (AU) | Phase (deg) | Abs. Mag. | Rotation Period (h) | K/V* | Temp** (K) |
|--------------|-----------------------------------|---------------------------|------------------------------------------------|----------|----------|-------------|-----------|---------------------|------|------------|
| 360 Carlova  | 3.05±0.06                         | 5.68±0.43                 | 0.012±0.003                                    | 2.51     | 1.59     | 9.65        | 8.56      | 6.18                | 0.99 | 253.4      |
| 241 Germania | 3.11±0.03                         | 3.79 ±0.74                | 0.010±0.005                                    | 3.34     | 2.41     | 6.72        | 7.78      | 15.51               | 0.82 | 86.9       |
| 423 Diotima  | 3.12±0.01                         | 5.93 0.86                 | 0.015±0.006                                    | 3.18     | 2.28     | 8.74        | 7.34      | 4.77                | 1.37 | 151.7      |
| 52 Europa    | 3.15±0.01                         | 3.89 ±0.62                | 0.008±0.004                                    | 2.89     | 3.22     | 18.09       | 6.48      | 5.63                | 1.22 | 228.2      |
| 762 Pulcova  | 3.01±0.01                         | 6.12±0.65                 | 0.011±0.005                                    | 3.26     | 2.33     | 7.70        | 8.04      | 5.84                | 1.05 | 222.48     |
| 165 Loreley  | 3.07±0.04                         | 1.94 ±0.47                | 0.006±0.005                                    | 2.90     | 1.90     | 3.15        | 7.88      | 7.23                | 1.33 | 180.5      |
| 431 Nephela  | 3.13±0.01                         | 7.48±0.57                 | 0.014±0.003                                    | 3.14     | 2.60     | 1.60        | 8.94      | 13.53               | 1.27 | 228.1      |



|                 |           |           |             |      |      |       |      |      |      |       |
|-----------------|-----------|-----------|-------------|------|------|-------|------|------|------|-------|
| 259<br>Aletheia | 3.13±0.01 | 3.98±0.26 | 0.009±0.002 | 3.52 | 2.55 | 3.20  | 7.90 | 8.14 | 1.23 | 215.5 |
| 372<br>Palma    | 3.13±0.01 | 7.48±0.57 | 0.014±0.003 | 3.22 | 2.22 | 2.02  | 7.46 | 8.57 | 1.16 | 173.1 |
| 94<br>Aurora    | 3.13±0.01 | 3.43±0.37 | 0.006±0.002 | 2.97 | 2.99 | 19.19 | 7.66 | 7.22 | 1.35 | 197.3 |

\* K-band to V-band scale, applied to spectra to reconcile the two reflectance values at two different wavelengths. Rau is the heliocentric range, and Dau is the geocentric range.

\*\* Temperatures corresponding to optimum thermal models.

**Table 3.** Key properties of asteroids fitted with thermal evolution models (columns 2-7), initial diameters (column 8), intermediate (columns 9-11), and final (columns 13-17) properties of asteroid fits, as well as the accretion times derived. Intermediate objects are slightly larger than the final objects since they have a non-hydrated and non-lithified surface layer of less than a few 100 m. After losing this thin layer by impacts, slightly smaller objects that reproduce the observed properties of asteroids are obtained. The current porosities were calculated from the masses and volumes (7, 8, 9) assuming a CM-like grain density of  $2460 \text{ kg m}^{-3}$  for all asteroids based on their spectral similarity and meteorite analogues provided in Carry et al. (7). Note that Carry et al. (7) assumed rubble pile structures and neglected the microporosity, while we provide the total porosity in the table. The theoretical reference diameters are diameters at zero porosity. The initial bulk density is  $1230 \text{ kg m}^{-3}$ , and the initial porosity is 50% for all objects. The accretion times derived include uncertainties for those cases for which they could be estimated.

| Asteroid      | Current semi-major axis | Current bulk density | Current porosity | Current diameter | Ref. diameter | Ref. mass | Fit initial diameter | Fit intermediate density | Fit intermediate porosity | Fit intermediate diameter | Fit final density  | Fit final porosity | Fit final diameter | Fit ref. diameter | Fit ref. mass | Derived accretion time |
|---------------|-------------------------|----------------------|------------------|------------------|---------------|-----------|----------------------|--------------------------|---------------------------|---------------------------|--------------------|--------------------|--------------------|-------------------|---------------|------------------------|
|               | AU                      | $\text{kg m}^{-3}$   | %                | km               | km            | kg        | km                   | $\text{kg m}^{-3}$       | %                         | km                        | $\text{kg m}^{-3}$ | %                  | km                 | km                | kg            | Ma                     |
| 10 Hygiea     | 3.14                    | 1945±265             | 21               | 434              | 401.3         | 8,31E+19  | 506.5                | 1941                     | 21.1                      | 435.0                     | 1946               | 20.9               | 434                | 402               | 8,37E+19      | 2.65 -0.7              |
| 24 Themis     | 3.14                    | 1810±670             | 26               | 183.8            | 166           | 5,89E+18  | 209                  | 1795                     | 27.0                      | 184.5                     | 1800               | 26.8               | 184                | 166               | 5,89E+18      | 1.69                   |
| 52 Europa     | 2.89                    | 1500±400             | 38               | 310.2            | 264.4         | 2,38E+19  | 335                  | 1519                     | 38.3                      | 312.4                     | 1520               | 38.2               | 310.4              | 266               | 2,42E+19      | 3.2 -1.5               |
| 65 Cybele     | 3.43                    | 1700±520             | 31               | 248.3            | 219.4         | 1,36E+19  | 277                  | 1706                     | 30.7                      | 248.6                     | 1709               | 30.5               | 248                | 220               | 1,37E+19      | 1.8 -0.4               |
| 94 Aurora     | 2.97                    | 1830±1100            | 26               | 186.4            | 169.1         | 6,23E+18  | 214                  | 1827                     | 25.7                      | 187.7                     | 1831               | 25.6               | 187.2              | 170               | 6,33E+18      | 1.68                   |
| 259 Aletheia  | 3.52                    | 2160±260             | 12               | 190.1            | 182.2         | 7,79E+18  | 229                  | 2169                     | 11.2                      | 190.5                     | 2176               | 11.5               | 190                | 182               | 7,77E+18      | 1.55 +0.1/-0.6         |
| 372 Palma     | 3.22                    | 1400±180             | 43               | 191.1            | 158.7         | 5,15E+18  | 201                  | 1425                     | 42.1                      | 191.9                     | 1427               | 42                 | 191.2              | 160               | 5,28E+18      | 2 -0.1                 |
| 423 Diotima   | 3.18                    | 1390±500             | 43               | 211.6            | 175.1         | 6,91E+18  | 222                  | 1398                     | 43.2                      | 212.5                     | 1400               | 43.1               | 211.6              | 176               | 7,02E+18      | 2.25 -0.6              |
| 431 Nephela   | 3.14                    | 1767±1007            | 28.2             | 93               | 83.3          | 7,45E+17  | 106                  | 1771                     | 28                        | 93.7                      | 1777               | 27.7               | 93.3               | 84                | 7,63E+17      | 1.57                   |
| 451 Patientia | 3.06                    | 1600±800             | 35               | 234.4            | 203.8         | 1,09E+19  | 257                  | 1610                     | 34.6                      | 235                       | 1613               | 34.4               | 234.4              | 204               | 1,09E+19      | 1.86 -0.9              |



**Table 4.** Observing parameters for asteroids observed in this study with the LXD mode of SpeX at NASA IRTF.

| Asteroid     | Date (UT) | Time (UT)   | Airmass   | Standard star | Spectral type | B-V* | V-K* |
|--------------|-----------|-------------|-----------|---------------|---------------|------|------|
| 94 Aurora    | 10/28/19  | 12:51-15:31 | 1.19-2.84 | SAO 75554     | G0            | 0.63 | 1.66 |
| 372 Palma    | 08/21/16  | 11:12-13:13 | 1.13-1.44 | HD 210105     | G2V           | 0.62 | 1.50 |
| 431 Nephela  | 02/09/18  | 8:30-12:35  | 1.34-1.33 | HD 217196     | G5V           | 0.69 | 1.62 |
| 259 Aletheia | 11/13/16  | 9:06-9:20   | 1.14-1.12 | HD285597      | G0            | 0.68 | 1.61 |
| 762 Pulcova  | 09/9/20   | 8:41-11:00  | 1.17-1.01 | SAO_74411     | G5            | 0.67 | 1.58 |
| 165 Loreley  | 08/11/20  | 11:50-14:45 | 1.17-1.88 | HD 207094     | G2V           | 0.63 | 1.41 |
| 52 Europa    | 06/22/17  | 5:51-7:19   | 1.23-1.13 | HD 133584     | G1V           | --   | --   |
| 423 Diotima  | 12/16/15  | 12:43-13:09 | 1.01-1.04 | SAO 79579     | G5            | 0.64 | 1.46 |
| 241 Germania | 02/04/20  | 13:20-16:10 | 1.13-2.39 | SAO 118200    | G5            | 0.71 | 1.86 |
| 360 Carlova  | 01/04/17  | 5:32-7:38   | 1.52-1.06 | HD 244686     | G0            | 0.66 | 1.55 |

\*B-V and V-K represent stars' colors.

**Table 5.** Observing parameters for asteroids observed in this study with the Prism mode of SpeX at NASA IRTF. The prism spectrum of asteroid 762 Pulcova is from (10).

| Asteroid     | Date (UT) | Time (UT)   | Airmass   | Standard star | Spectral type | B-V  | V-K  |
|--------------|-----------|-------------|-----------|---------------|---------------|------|------|
| 94 Aurora    | 12/29/20  | 14:04-14:50 | 1.00-1.03 | HD 86043      | G5            | 0.60 | 1.41 |
| 372 Palma    | 08/21/16  | 13:33-13:40 | 1.59-1.60 | HD 210105     | G2V           | 0.62 | 1.50 |
| 431 Nephela  | 12/29/20  | 10:03-12:07 | 1.10-1.29 | SAO 98993     | G0            | 0.63 | 1.59 |
| 259 Aletheia | 11/13/16  | 7:56-8:10   | 1.40-1.43 | HD 285597     | G0            | 0.68 | 1.61 |
| 165 Loreley  | 12/29/20  | 4:53-5:37   | 1.46-1.38 | HD 211567     | G5V           | 0.61 | 1.46 |
| 52 Europa    | 12/29/20  | 6:25-7:34   | 1.82-1.60 | HD 258906     | G5            | 0.66 | 1.54 |
| 423 Diotima  | 12/29/20  | 5:41-6:31   | 1.38-1.83 | HD 283933     | G0            | 0.62 | 1.62 |
| 241 Germania | 12/29/20  | 14:54-15:54 | 1.94-1.51 | HD 123715     | G3V           | 0.64 | 1.52 |
| 360 Carlova  | 01/04/17  | 8:40-8:48   | 1.01-1.01 | HD244686      | G0            | 0.66 | 1.55 |

\*B-V and \*V-K represent stars' colors.

**Table 6:** Parameters used for the calculation of radiogenic energy. Heat Sources: The element mass fractions are referenced in Eq 1. The element mass fractions refer to stable isotopes, the initial ratios are between unstable and stable isotopes of an element, and the decay energies are per particle. The number of atoms of the stable isotope per 1 kg of the primordial material is



$f = xN_A/m_a$  with the relative mass fraction  $x$  of the stable isotope, the molar mass of the radioactive isotope  $m_a$  in kg, and the Avogadro number  $N_A$ .

| Isotope                     | <sup>26</sup> Al      | <sup>60</sup> Fe      | <sup>40</sup> K       | <sup>232</sup> Th     | <sup>235</sup> U      | <sup>238</sup> U      |
|-----------------------------|-----------------------|-----------------------|-----------------------|-----------------------|-----------------------|-----------------------|
| Element mass fraction $x$   | $8.68 \cdot 10^{-3}$  | $1.81 \cdot 10^{-1}$  | $5.32 \cdot 10^{-4}$  | $2.96 \cdot 10^{-8}$  | $8.08 \cdot 10^{-9}$  | $8.08 \cdot 10^{-9}$  |
| Half-life $\lambda$ [years] | $7.17 \cdot 10^5$     | $2.62 \cdot 10^6$     | $1.25 \cdot 10^9$     | $1.41 \cdot 10^{10}$  | $7.04 \cdot 10^8$     | $4.47 \cdot 10^9$     |
| Initial ratio $Z$           | $5 \cdot 10^{-5}$     | $1.15 \cdot 10^{-8}$  | $1.50 \cdot 10^{-3}$  | 1.0                   | $8 \cdot 10^{-3}$     | $9.92 \cdot 10^{-1}$  |
| Decay energy $E$ [J]        | $4.99 \cdot 10^{-13}$ | $4.34 \cdot 10^{-13}$ | $1.11 \cdot 10^{-13}$ | $6.47 \cdot 10^{-12}$ | $7.11 \cdot 10^{-13}$ | $7.61 \cdot 10^{-12}$ |



## References

1. Rivkin, A.S., Howell, E.S., Emery, J.P., Infrared Spectroscopy of Large, Low-Albedo Asteroids: Are Ceres and Themis Archetypes or Outliers? *Journal of Geophysical Research: Planets* **124**, Issue 5 p. 1393-1409 (2019).
2. Cushing, M. Spectral Extraction Package for SpeX, a 0.8-5.5 Micron Cross-Dispersed Spectrograph. *The Astronomical Society of the Pacific* **166**, 362-376 (2004).
3. Takir, D. & Emery, J.P. Outer Main Belt asteroids: Identification and distribution of four 3- $\mu$ m spectral groups. *Icarus* **219**, 641-654 (2012).
4. Licandro, L. et al. 65 Cybele: Detection of small silicate grains, water-ice and organics. *Astronomy. Astrophysics.* **525**, A34 (2011).
5. Rivkin, A.S., Emery, J.P., Detection of ice and organics on an asteroidal surface. *Nature* **64**, 1322–1323 (2010).
6. Campins, H. et al., Water ice and organics on the surface of the Asteroid 24 Themis. *Nature* **464**, 1320–1321(2010).
7. Carry, B. Density of asteroids. *Planetary and Space Science* **73** 98-118 (2012).
8. Vernazza, P. et al. A basin-free spherical shape as an outcome of a giant impact on asteroid Hygiea. *Nature Astronomy* **4**, 136–141 (2020).
9. A Fienga, A., Avdellidou, C., Hanuš, J. Asteroid masses obtained with INPOP planetary ephemerides. *Monthly Notices of the Royal Astronomical Society* **492**(1), 589–602 (2020).
10. Lindsay, S.S., Marchis, F., Emery, J.P., Enriquez, J.E., Assafin, M. Composition, mineralogy, and porosity of multiple asteroid systems from visible and near-infrared spectral data. *Icarus* **247**, 53-70 (2015).
